# Supplementary material for: Discovery of novel blood-brain barrier neuropathology in schizophrenia and bipolar disorder midbrain
Source: Research Square preprint supplement (doi:10.21203/rs.3.rs-5776506/v1), 2025-01-13
Supplement: Supplementary file 1 [file 8793badb312ef4bebb7445f9.docx]

## **Supplementary Materials**

**Supplementary Table S1:** Taqman gene expression assays used in this study

| Gene name | Gene abbreviation | TaqMan Assay ID |
| --- | --- | --- |
| Glyceraldehyde-3-phosphate dehydrogenase | *GAPDH* | Hs99999905_m1 |
| Beta-glucuronidase | *GUSB* | Hs99999908_m1 |
| TATA-box binding protein | *TBP* | Hs00427620_m1 |
| Ubiquitin C | *UBC* | Hs00824723_m1 |
| Collagen type IV alpha 1 chain | *COL4A1* | Hs01011868_m1 |
| Platelet and endothelial cell adhesion molecule 1 | *PECAM1* | Hs00169777_m1 |
| Intercellular adhesion molecule 1 | *ICAM1* | Hs00164932_m1 |
| Claudin 5 | *CLDN5* | Hs01561351_m1 |
| Occludin | *OCLN* | Hs00170162_m1 |

**Supplementary Table S2 Number of outliers removed from each analysis**

|  | *Number of Outliers* | **By diagnosis** | | | **By inflammatory subgroups** | | | | |
| --- | --- | --- | --- | --- | --- | --- | --- | --- | --- |
|  |  | ***CTRL*** | ***SCZ*** | ***BPD*** | ***CTRL-LI*** | ***SCZ-LI*** | ***SCZ-HI*** | ***BPD-LI*** | ***BPD-HI*** |
| mRNA | *CCL2* | 3 | 1 | 3 | 2 | 1 | 1 | 3 | 0 |
| *CD163* | 1 | 1 | 2 | 1 | 0 | 1 | 2 | 0 |
| *CLDN5* | 2 | 1 | 1 | 2 | 0 | 1 | 2 | 1 |
| *OCLN* | 2 | 1 | 3 | 1 | 1 | 1 | 1 | 0 |
| *ICAM1* | 2 | 1 | 1 | 1 | 0 | 1 | 2 | 0 |
| *PECAM1* | 2 | 1 | 0 | 2 | 1 | 0 | 2 | 0 |
| *ColIV* | 1 | 1 | 2 | 1 | 1 | 0 | 2 | 0 |
| Protein | *CCL2* | 1 | 1 | 1 | 1 | 1 | 1 | 1 | 1 |
| *CD163* | 2 | 3 | 3 | 2 | 2 | 0 | 1 | 0 |
| *PECAM1* | 1 | 0 | 2 | 1 | 0 | 0 | 1 | 0 |
| *ColIV* | 1 | 1 | 2 | 1 | 1 | 1 | 1 | 0 |

**Supplementary Table S3 Correlation between clinical variables and transcript and protein levels in schizophrenia (n=35)**

|  |  | **Age of Onset** | | **Duration of Illness** | | **Lifetime CPZE** | |
| --- | --- | --- | --- | --- | --- | --- | --- |
|  |  | r/rho | *p* value | r/rho | *p* value | r/rho | *p* value |
| mRNA | *CCL2* | -0.197 | 0.256 | 0.034 | 0.847 | 0.334 | 0.050* |
| *CD163* | -0.234 | 0.177 | 0.318 | 0.062# | 0.398 | 0.018* |
| *CLDN5* | -0.297 | 0.083 | 0.351 | 0.039* | 0.327 | 0.056# |
| *OCLN* | 0.059 | 0.734 | 0.294 | 0.086 | 0.023 | 0.894 |
| *ICAM1* | -0.366 | 0.031* | 0.351 | 0.038* | 0.143 | 0.414 |
| *PECAM1* | -0.320 | 0.061 | 0.353 | 0.037* | 0.478 | 0.004* |
| *ColIV* | -0.010 | 0.952 | 0.152 | 0.383 | -0.033 | 0.853 |
| Protein | *CCL2* | -0.179 | 0.304 | 0.034 | 0.845 | 0.338 | 0.047* |
| *CD163* | -0.287 | 0.095 | 0.477 | 0.004* | 0.517 | 0.001* |
| *PECAM1* | -0.126 | 0.476 | 0.149 | 0.392 | 0.271 | 0.115 |
| *ColIV* | -0.279 | 0.105 | 0.258 | 0.134 | 0.272 | 0.114 |

**Supplementary Table S4 Correlation between clinical variables and transcript and protein levels in bipolar disorder (n=34)**

|  |  | **Age of Onset** | | **Duration of Illness** | | **Lifetime CPZE**  **(n=23)** | |
| --- | --- | --- | --- | --- | --- | --- | --- |
|  |  | r/rho | *p* value | r/rho | *p* value | r/rho | *p* value |
| mRNA | *CCL2* | -0.371 | 0.031* | 0.181 | 0.305 | 0.307 | 0.078 |
| *CD163* | -0.107 | 0.546 | 0.283 | 0.104 | 0.314 | 0.071 |
| *CLDN5* | -0.179 | 0.312 | 0.135 | 0.448 | 0.390 | 0.022* |
| *OCLN* | -0.266 | 0.129 | 0.161 | 0.363 | 0.532 | 0.001* |
| *ICAM1* | -0.161 | 0.362 | 0.430 | 0.011* | -0.093 | 0.601 |
| *PECAM1* | -0.018 | 0.919 | -0.059 | 0.739 | 0.547 | 8.21E-04* |
| *ColIV* | 0.025 | 0.887 | 0.024 | 0.891 | 0.369 | 0.032* |
| Protein | *CCL2* | -0.310 | 0.074 | 0.241 | 0.170 | 0.275 | 0.115 |
| *CD163* | -0.264 | 0.131 | 0.273 | 0.118 | -0.012 | 0.945 |
| *PECAM1* | -0.261 | 0.135 | 0.200 | 0.257 | 0.035 | 0.843 |
| *ColIV* | -0.024 | 0.893 | 0.150 | 0.397 | -0.184 | 0.297 |

**Supplementary Table S5 Correlation between BMI and BBB-related marker transcript and protein levels**

| **BMI** |  | **All samples (n=96)** | |
| --- | --- | --- | --- |
|  |  | *Spearman’s rho* | *p value* |
| mRNA | *CCL2* | 0.121 | 0.240 |
| *CD163* | 0.103 | 0.318 |
| *CLDN5* | 0.198 | 0.05* |
| *OCLN* | 0.189 | 0.065 |
| *ICAM1* | 0.144 | 0.162 |
| *PECAM1* | 0.265 | 0.009* |
| *ColIV* | 0.119 | 0.249 |
| Protein | *CCL2* | 0.148 | 0.150 |
| *CD163* | 0.149 | 0.147 |
| *PECAM1* | 0.160 | 0.120 |
| *ColIV* | 0.039 | 0.709 |

**Supplementary Figure S1 Macrophage chemokine CCL2 and macrophage marker CD163 mRNA and protein levels across diagnostic groups** (A) CCL2 mRNA levels, (B) CCL2 protein levels, (C) CD163 mRNA levels, (D) CD163 protein levels. Bar denotes mean ± SEM, * p≤ 0.05, ** p≤ 0.01.

**Supplementary Figure S2 Adhesion molecule and basement membrane protein mRNA and protein levels across diagnostic groups.** (A) PECAM mRNA levels, (B) PECAM1 protein levels, (C) ColIV mRNA levels, (D) ColIV protein levels. Bar denotes mean ± SEM, # p=0.06, * p≤ 0.05, ** p≤ 0.01, *** p≤0.001, **** p≤0.0001.
